# Supplementary material for: NR2F2 is required in the embryonic testis for fetal Leydig cell development
Source: eLife. 2025 Jul 10;14:RP103783. doi: 10.7554/eLife.103783 (PMC12245173; doi:10.7554/eLife.103783)
Supplement: Figure 2—figure supplement 1—source data 1. [file elife-103783-fig2-figsupp1-data1.xlsx]

## Sheet: Q-RT PCR E12.5 
Sample	Relative Nr2f2 expression
Nr2f2 F/+ XY E12.5	0.65
Nr2f2 F/+ XY E12.5	1.32
Nr2f2 F/+ XY E12.5	0.92
Nr2f2 F/+ XY E12.5	1.33
Nr2f2 F/+ XY E12.5	0.91
Nr2f2 F/+ XY E12.5	0.84
Nr2f2 F/+ XY E12.5	1.25
Wt1CreERT2/+,Nr2f2 F/F XY E12.5	0.02
Wt1CreERT2/+,Nr2f2 F/F XY E12.5	0.06
Wt1CreERT2/+,Nr2f2 F/F XY E12.5	0.03
Wt1CreERT2/+,Nr2f2 F/F XY E12.5	0.04
Wt1CreERT2/+,Nr2f2 F/F XY E12.5	0.03
Wt1CreERT2/+,Nr2f2 F/F XY E12.5	0.02
Wt1CreERT2/+,Nr2f2 F/F XY E12.5	0.03

## Sheet: Q-RT PCR E14.5  
Sample	Relative Nr2f2 expression	Relative Dhh expression	Relative Pdgfa expression	Relative Amh expression
Nr2f2 F/+ XY E14.5	1.14	1.14	1.24	0.99
Nr2f2 F/+ XY E14.5	1.02	1.28	0.64	1.29
Nr2f2 F/+ XY E14.5	1.01	0.77	1.08	0.88
Nr2f2 F/+ XY E14.5	1.18	1.01	1.14	1.08
Nr2f2 F/+ XY E14.5	1.05	0.85	1.31	0.82
Nr2f2 F/+ XY E14.5	1.04	1.19	0.89	1.26
Wt1CreERT2/+,Nr2f2 F/F XY E14.5	0.01	0.01	0.41	0.4
Wt1CreERT2/+,Nr2f2 F/F XY E14.5	0.01	0.01	0.4	0.45
Wt1CreERT2/+,Nr2f2 F/F XY E14.5	0.02	0.02	0.54	0.76
Wt1CreERT2/+,Nr2f2 F/F XY E14.5	0.01	0.01	0.4	0.33
Wt1CreERT2/+,Nr2f2 F/F XY E14.5	0.01	0.01	0.4	0.38
Wt1CreERT2/+,Nr2f2 F/F XY E14.5	0.02	0.02	0.5	0.61
Wt1CreERT2/+,Nr2f2 F/F XY E14.5	0.03	0.03	0.63	0.69
	Relative Cyp11a1 expression	Relative Cyp17a1 expression	Relative Dhh expression	Relative Pdgfa expression	Relative Amh expression
WT XY E14.5	0.7	0.76	1.32	0.77	1.17
WT XY E14.5	1.4	1.5	0.95	1.2	0.87
WT XY E14.5	1.31	1.08	1.02	1.17	0.94
WT XY E14.5	1.07	1	0.96	0.94	1.09
WT XY E14.5	1.12	1.09	0.92	0.91	1.07
Wt1CreERT2/+ XY E14.5	1.11	0.43	0.66	0.39	0.6
Wt1CreERT2/+ XY E14.5	1.17	0.75	0.64	0.53	0.59
Wt1CreERT2/+ XY E14.5	1.27	0.74	0.64	0.53	0.46
Wt1CreERT2/+ XY E14.5	0.93	0.83	0.69	0.49	0.55
Wt1CreERT2/+ XY E14.5	1.26	1.29	0.93	0.58	0.7

## Sheet: Testis cord Area E14.5 
Sample	Genotype	testis cords area (um2)
WCTF 136	WT	2436.66
		8757.12
		7007.32
		6626.03
		6881.26
		15119.4
		10249.8
		6345.01
		10481.8
		4490.16
		13583.2
		12596.2
		5124.6
		4866.24
		18633.8
		15537.3
		6230.6
WCTF139	Nr2f2 F/+	10166.6
		2482.84
		17017.1
		11983.6
		14813.4
		11708.8
		19118.2
		16387.6
		3681.2
		9287.55
		9837.74
		6739.4
		7129
		9154.84
		15558.9
		3678.08
		7396.3
		2686.9
		3618.17
		6772.68
		9592.7
WCTF154	WT	15437.4
		16519.3
		4554.85
		8415.56
		7438.74
		13410.8
		8426.59
		5947.08
		11527
		3248.53
		6680.95
		12459.1
		4611.85
		8739.85
		9308.77
		8127.46
		3790.2
		11886.2
		8723.63
		2524.23
		1503.31
		4582.52
WCTF137	Wt1CreERT2/+,Nr2f2 F/F	31936.6
		2656.94
		31512
		44789.2
		3287.85
		17016.5
		36998.3
		23211.9
		9928.85
WCTF142	Wt1CreERT2/+,Nr2f2 F/F	20306.2
		11874.4
		10570
		37931.9
		20940.8
		17315
		6656.61
		31348.7
		4546.74
WCTF147	Wt1CreERT2/+,Nr2f2 F/F	16532.2
		36948.3
		7829.49
		14431.5
		54627
		4198.84
		4211.94
		21846.9
