# Supplementary material for: NR2F2 is required in the embryonic testis for fetal Leydig cell development
Source: eLife. 2025 Jul 10;14:RP103783. doi: 10.7554/eLife.103783 (PMC12245173; doi:10.7554/eLife.103783)
Supplement: Figure 2—source data 1. [file elife-103783-fig2-data1.xlsx]

## Sheet: Cell Counts E12.5
Sample	HSD3B+cells/10000 um2
Nr2f2 F/+ XY E12.5	0.29
Nr2f2 F/+ XY E12.5	0.33
Nr2f2 F/+ XY E12.5	4.25
Wt1CreERT2/+,Nr2f2 F/F XY E12.5	0.1
Wt1CreERT2/+,Nr2f2 F/F XY E12.5	0.11
Wt1CreERT2/+,Nr2f2 F/F XY E12.5	1.15

## Sheet: Cell counts E14.5
Sample	HSD3B+cells/10000 um2	SOX9+cells/10000 um2
Nr2f2 F/+ XY E14.5	9.39	74.2798
Nr2f2 F/+ XY E14.5	9.98	74.697
Nr2f2 F/+ XY E14.5	8.94	62.973
Nr2f2 F/+ XY E14.5	9.54	54.5198
Wt1CreERT2/+,Nr2f2 F/F XY E14.5	2.9	23.6152
Wt1CreERT2/+,Nr2f2 F/F XY E14.5	5.88	43.833
Wt1CreERT2/+,Nr2f2 F/F XY E14.5	4.18	28.8793
Wt1CreERT2/+,Nr2f2 F/F XY E14.5	2	11.7284

## Sheet: Q-RT PCR E14.5
Sample	Relative Cyp11a1 expression	Relative Cyp17a1 expression	Relative Insl3 expression	Relative Sox9 expression
Nr2f2 F/+ XY E14.5	0.87	0.35	0.99	0.88
Nr2f2 F/+ XY E14.5	1	1.23	0.73	1.13
Nr2f2 F/+ XY E14.5	1.43	1.02	0.95	0.82
Nr2f2 F/+ XY E14.5	1.54	1.34	1.44	1.09
Nr2f2 F/+ XY E14.5	1	1.23	1.21	1.13
Nr2f2 F/+ XY E14.5	0.73	0.68	0.5	1.29
Wt1CreERT2/+,Nr2f2 F/F XY E14.5	0.12	0.07	0.01	0.77
Wt1CreERT2/+,Nr2f2 F/F XY E14.5	0.13	0.06	0.02	0.83
Wt1CreERT2/+,Nr2f2 F/F XY E14.5	0.17	0.2	0.02	1.29
Wt1CreERT2/+,Nr2f2 F/F XY E14.5	0.09	0.1	0.02	0.66
Wt1CreERT2/+,Nr2f2 F/F XY E14.5	0.21	0.22	0.02	0.68
Wt1CreERT2/+,Nr2f2 F/F XY E14.5	0.13	0.07	0.03	0.95
Wt1CreERT2/+,Nr2f2 F/F XY E14.5	0.05	0.03	0.01	1.18
