# Supplementary material for: NR2F2 is required in the embryonic testis for fetal Leydig cell development
Source: eLife. 2025 Jul 10;14:RP103783. doi: 10.7554/eLife.103783 (PMC12245173; doi:10.7554/eLife.103783)
Supplement: Figure 3—figure supplement 1—source data 1. [file elife-103783-fig3-figsupp1-data1.xlsx]

## Sheet: Q-RT PCR E12.5 
Sample	Relative Nr2f2 expression	Relative Sox9 expression	Relative Dhh expression	Relative Gli1 expression	Relative Amh expression
Control XY E12.5	0.98	1.22	0.89	0.74	0.99
Control XY E12.5	1.39	1.6	0.91	1.31	0.89
Control XY E12.5	1.13	1.09	1.08	1.02	1.18
Control XY E12.5	0.68	1.06	1.1	1.03	0.94
Control XY E12.5	1.09	0.87	1.22	1.17	1.15
Control XY E12.5	0.87	0.51	0.85	0.84	0.9
Nr5a1-cre/+,Nr2f2 F/F XY E12.5	0.63	1.23	1.35	1.17	1.02
Nr5a1-cre/+,Nr2f2 F/F XY E12.5	0.58	1.72	0.98	0.91	0.72
Nr5a1-cre/+,Nr2f2 F/F XY E12.5	0.63	1.31	0.99	0.77	1
Nr5a1-cre/+,Nr2f2 F/F XY E12.5	0.46	1.23	1.14	0.85	0.96
Nr5a1-cre/+,Nr2f2 F/F XY E12.5	0.66	0.86	1.13	0.87	0.97

## Sheet: Q-RT PCR E14.5
Sample	Relative Nr2f2 expression
Control XY E14.5	1.26
Control XY E14.5	1.01
Control XY E14.5	0.9
Control XY E14.5	0.96
Control XY E14.5	0.9
Nr5a1-cre/+,Nr2f2 F/F XY E14.5	0.75
Nr5a1-cre/+,Nr2f2 F/F XY E14.5	0.45
Nr5a1-cre/+,Nr2f2 F/F XY E14.5	0.53
Nr5a1-cre/+,Nr2f2 F/F XY E14.5	0.39
Nr5a1-cre/+,Nr2f2 F/F XY E14.5	0.35

## Sheet: Cell counts E14.5
Sample	SOX9+ cells/10000 um2
Control XY E14.5	29
Control XY E14.5	23
Control XY E14.5	24.27
Nr5a1-cre/+,Nr2f2 F/F XY E14.5	35
Nr5a1-cre/+,Nr2f2 F/F XY E14.5	30
Nr5a1-cre/+,Nr2f2 F/F XY E14.5	22.27

## Sheet: Anogenital distance P0-P1
Sample	Anogenital distance (mm)
Control XX P0	0.7
Control XX P0	0.66
Control XX P0	0.62
Control XX P0	0.65
Control XX P0	0.68
Control XX P0	0.68
Control XX P0	0.83
Control XX P0	0.65
Control XX P0	0.75
Control XX P0	0.75
Control XX P0	0.85
Control XX P0	0.8
Control XX P1	0.52
Control XX P1	0.82
Control XX P1	0.76
Control XX P1	0.85
Control XX P1	0.82
Control XX P1	0.75
Control XX P1	0.85
Control XX P1	0.67
Control XY P0	1.35
Control XY P0	1.05
Control XY P0	1.23
Control XY P0	1.05
Control XY P0	1.25
Control XY P0	1.14
Control XY P0	1.35
Control XY P0	1.4
Control XY P0	1.5
Control XY P0	1.11
Control XY P1	1.17
Control XY P1	1.25
Control XY P1	1.02
Control XY P1	1.32
Nr5a1-cre/+,Nr2f2 F/F XY P0	0.97
Nr5a1-cre/+,Nr2f2 F/F XY P0	1.13
Nr5a1-cre/+,Nr2f2 F/F XY P1	1
