# Supplementary material for: NR2F2 is required in the embryonic testis for fetal Leydig cell development
Source: eLife. 2025 Jul 10;14:RP103783. doi: 10.7554/eLife.103783 (PMC12245173; doi:10.7554/eLife.103783)
Supplement: Figure 3—source data 1. [file elife-103783-fig3-data1.xlsx]

## Sheet: Cell Counts E12.5
Sample	HSD3B+cells/10000 um2
Control XY E12.5	3.12
Control XY E12.5	3.72
Control XY E12.5	8.5
Control XY E12.5	0.84
Nr5a1-cre/+,Nr2f2 F/F XY E12.5	1.17
Nr5a1-cre/+,Nr2f2 F/F XY E12.5	0.58
Nr5a1-cre/+,Nr2f2 F/F XY E12.5	0.96
Nr5a1-cre/+,Nr2f2 F/F XY E12.5	0.54

## Sheet: Cell counts E14.5
Sample	HSD3B+cells/10000 um2
Control XY E14.5	10.85
Control XY E14.5	8.52
Control XY E14.5	10.92
Control XY E14.5	10.8
Nr5a1-cre/+,Nr2f2 F/F XY E14.5	5.03
Nr5a1-cre/+,Nr2f2 F/F XY E14.5	6.15
Nr5a1-cre/+,Nr2f2 F/F XY E14.5	6.7
Nr5a1-cre/+,Nr2f2 F/F XY E14.5	5.6
Nr5a1-cre/+,Nr2f2 F/F XY E14.5	6.3

## Sheet: Q-RT PCR E14.5
Sample	Relative Sox9 expression	Relative Dhh expression	Relative pdgfa expression	Relative Amh expression	Relative Cyp11a1 expression	Relative Cyp17a1 expression	Relative Insl3 expression
Control XY E14.5	1.4	0.75	1.25	1.81	0.75	0.85	1.22
Control XY E14.5	1.02	0.7	0.94	0.76	0.44	0.57	0.73
Control XY E14.5	0.91	0.81	0.91	0.92	0.72	1.11	0.75
Control XY E14.5	1.33	0.95	0.87	0.97	1.27	1.62	1.39
Control XY E14.5	1.09	0.79	1.06	0.82	1.19	0.85	1.09
Control XY E14.5	0.95	0.9			1.17	0.82
Control XY E14.5	0.84	1.1			1.16	0.94
Control XY E14.5	0.75	1.14			1.2	1.3
Control XY E14.5	0.72	0.88			1.09	1
Nr5a1-cre/+,Nr2f2 F/F XY E14.5	1.47	1.12	1.28	1.07	0.09	0.03	0.07
Nr5a1-cre/+,Nr2f2 F/F XY E14.5	2.02	1.51	1.33	0.96	0.27	0.24	0.06
Nr5a1-cre/+,Nr2f2 F/F XY E14.5	1.58	1.27	1.05	0.88	0.14	0.07	0.06
Nr5a1-cre/+,Nr2f2 F/F XY E14.5	1.23	1.15	1.26	1.03	0.15	0.06	0.06
Nr5a1-cre/+,Nr2f2 F/F XY E14.5	1.19	1.13	1.03	0.82	0.31	0.17	0.03
Nr5a1-cre/+,Nr2f2 F/F XY E14.5	1.2	1.1			0.2	0.11
Nr5a1-cre/+,Nr2f2 F/F XY E14.5	1.03	0.88			0.16	0.12
