# Supplementary material for: NR2F2 is required in the embryonic testis for fetal Leydig cell development
Source: eLife. 2025 Jul 10;14:RP103783. doi: 10.7554/eLife.103783 (PMC12245173; doi:10.7554/eLife.103783)
Supplement: Figure 4—figure supplement 1—source data 1. [file elife-103783-fig4-figsupp1-data1.xlsx]

## Sheet: Cell Counts E12.5
Sample	Total number gonadal cells/section	% ARX + cells	% BrdU+ ARX+ cells
Control XY E12.5	2233	50.99	29.84
Control XY E12.5	2751	49.47	34.39
Control XY E12.5	3227	56.24	36.69
Control XY E12.5	1756	50.61	35.27
Nr5a1-cre/+,Nr2f2 F/F XY E12.5	2458	47.37	30.02
Nr5a1-cre/+,Nr2f2 F/F XY E12.5	2446	47.47	34.29
Nr5a1-cre/+,Nr2f2 F/F XY E12.5	2492	52.22	33.27
Nr5a1-cre/+,Nr2f2 F/F XY E12.5	2207	45.54	36.12

## Sheet: Cell counts E14.5
Sample	Total number gonadal cells/section	Activated Caspase 3 + cells/ 100 000 um2 interstitial area
Control XY E14.5	4286	0
Control XY E14.5	3164	1.1
Control XY E14.5	3216	0
Control XY E14.5		0
Nr5a1-cre/+,Nr2f2 F/F XY E14.5	2790	0
Nr5a1-cre/+,Nr2f2 F/F XY E14.5	3063	2.6
Nr5a1-cre/+,Nr2f2 F/F XY E14.5	3780.5	0.3

## Sheet: Q-RT PCR E12.5 
Sample	Relative Arx expression
Control XY E12.5	1
Control XY E12.5	1.14
Control XY E12.5	0.87
Control XY E12.5	1.03
Control XY E12.5	1.2
Control XY E12.5	0.81
Nr5a1-cre/+,Nr2f2 F/F XY E12.5	0.65
Nr5a1-cre/+,Nr2f2 F/F XY E12.5	1.05
Nr5a1-cre/+,Nr2f2 F/F XY E12.5	0.71
Nr5a1-cre/+,Nr2f2 F/F XY E12.5	0.65
Nr5a1-cre/+,Nr2f2 F/F XY E12.5	0.91
Nr5a1-cre/+,Nr2f2 F/F XY E12.5	0.71

## Sheet: Q-RT PCR E14.5
Sample	Relative Arx expression
Control XY E14.5	1.08
Control XY E14.5	0.96
Control XY E14.5	1.01
Control XY E14.5	0.95
Nr5a1-cre/+,Nr2f2 F/F XY E14.5	1.08
Nr5a1-cre/+,Nr2f2 F/F XY E14.5	1.12
Nr5a1-cre/+,Nr2f2 F/F XY E14.5	0.99
Nr5a1-cre/+,Nr2f2 F/F XY E14.5	0.93
