# Supplementary material for: NR2F2 is required in the embryonic testis for fetal Leydig cell development
Source: eLife. 2025 Jul 10;14:RP103783. doi: 10.7554/eLife.103783 (PMC12245173; doi:10.7554/eLife.103783)
Supplement: Figure 4—source data 1. [file elife-103783-fig4-data1.xlsx]

## Sheet: Cell counts E14.5
Sample	% ARX +cells	% BRdU+ ARX +cells	NR5A1+ cells/10 000 um2
Control XY E14.5	56.99	27.01	6.89744
Control XY E14.5	54.92	28.42	7.73721
Control XY E14.5	47.23	24.96	9.05585
Control XY E14.5			6.64878
Nr5a1-cre/+,Nr2f2 F/F XY E14.5	48.54	21.85	3.63328
Nr5a1-cre/+,Nr2f2 F/F XY E14.5	48.09	22.06	4.15375
Nr5a1-cre/+,Nr2f2 F/F XY E14.5	49.4	20.69	3.0998
Nr5a1-cre/+,Nr2f2 F/F XY E14.5			3.442

## Sheet: Q-RT PCR E14.5
Sample	Relative Gli1 expression	Relative Pdgfra expression	Relative Pdgfa expression	Relative Sgpl1 expression	Relative Cdh5 expression	Relative Notch2 expression	Relative Heyl expression	Relative Hes1 expression
Control XY E14.5	0.91	0.84	1.65	1.59	1.15	0.58	1.3	0.92
Control XY E14.5	0.97	0.81	0.74	0.78	0.93	1.28	0.96	0.79
Control XY E14.5	1.04	1.2	0.9	0.9	0.94	1.05	0.91	0.77
Control XY E14.5	1.02	1.14	0.85	0.92	0.98	1.09	0.83	0.93
Control XY E14.5	1.06	1.08	1.07	0.98			1	0.67
Control XY E14.5	0.81							0.83
Control XY E14.5	1.05							0.9
Control XY E14.5	1.14
Control XY E14.5	1.03
Nr5a1-cre/+,Nr2f2 F/F XY E14.5	0.8	0.66	1.08	1.75	0.96	1.04	0.9	0.6
Nr5a1-cre/+,Nr2f2 F/F XY E14.5	1.23	0.97	0.71	0.92	0.96	1.5	0.84	0.84
Nr5a1-cre/+,Nr2f2 F/F XY E14.5	1.03	1	0.98	1.13	0.81	1.23	0.67	0.67
Nr5a1-cre/+,Nr2f2 F/F XY E14.5	0.87	1	1.06	1.02	0.88	0.86	0.62	0.71
Nr5a1-cre/+,Nr2f2 F/F XY E14.5	0.9	0.88	0.95	1.07			0.62	0.46
Nr5a1-cre/+,Nr2f2 F/F XY E14.5	0.85
Nr5a1-cre/+,Nr2f2 F/F XY E14.5	0.76
