# Supplementary material for: NR2F2 is required in the embryonic testis for fetal Leydig cell development
Source: eLife. 2025 Jul 10;14:RP103783. doi: 10.7554/eLife.103783 (PMC12245173; doi:10.7554/eLife.103783)
Supplement: Figure 5—figure supplement 1—source data 1. [file elife-103783-fig5-figsupp1-data1.xlsx]

## Sheet: Q-RT PCR E14.5
Sample	Relative Bhmt expression
Control XY E14.5	1.05
Control XY E14.5	0.69
Control XY E14.5	1.84
Control XY E14.5	0.65
Control XY E14.5	1.14
Nr5a1-cre/+,Nr2f2 F/F XY E14.5	1.15
Nr5a1-cre/+,Nr2f2 F/F XY E14.5	0.43
Nr5a1-cre/+,Nr2f2 F/F XY E14.5	0.29
Nr5a1-cre/+,Nr2f2 F/F XY E14.5	0.16
Nr5a1-cre/+,Nr2f2 F/F XY E14.5	0.15
Adult control testis	888.05
Adult control testis	900.45
Adult control testis	636.71
Adult control testis	834.34
Adult control testis	828.58
Adult control testis	713.86
