# Supplementary material for: NR2F2 is required in the embryonic testis for fetal Leydig cell development
Source: eLife. 2025 Jul 10;14:RP103783. doi: 10.7554/eLife.103783 (PMC12245173; doi:10.7554/eLife.103783)
Supplement: Figure 5—source data 1. [file elife-103783-fig5-data1.xlsx]

## Sheet: Q-RT PCR E14.5
Sample	Relative Cyp11a1 expression normalised to FLC numbers	Relative Cyp17a1 expression normalised to FLC numbers
Control XY E14.5	0.75	0.85
Control XY E14.5	0.44	0.57
Control XY E14.5	0.72	1.11
Control XY E14.5	1.27	1.62
Control XY E14.5	1.19	0.85
Control XY E14.5	1.17	0.82
Control XY E14.5	1.16	0.94
Control XY E14.5	1.2	1.3
Control XY E14.5	1.09	1
Nr5a1-cre/+,Nr2f2 F/F XY E14.5	0.16	0.05
Nr5a1-cre/+,Nr2f2 F/F XY E14.5	0.5	0.45
Nr5a1-cre/+,Nr2f2 F/F XY E14.5	0.25	0.13
Nr5a1-cre/+,Nr2f2 F/F XY E14.5	0.27	0.12
Nr5a1-cre/+,Nr2f2 F/F XY E14.5	0.58	0.31
Nr5a1-cre/+,Nr2f2 F/F XY E14.5	0.38	0.2
Nr5a1-cre/+,Nr2f2 F/F XY E14.5	0.29	0.23
Nr2f2 F/+ XY E14.5	0.87	0.35
Nr2f2 F/+ XY E14.5	1	1.23
Nr2f2 F/+ XY E14.5	1.43	1.02
Nr2f2 F/+ XY E14.5	1.54	1.34
Nr2f2 F/+ XY E14.5	1	1.23
Nr2f2 F/+ XY E14.5	0.73	0.68
Wt1CreERT2/+,Nr2f2 F/F XY E14.5	0.31	0.17
Wt1CreERT2/+,Nr2f2 F/F XY E14.5	0.32	0.16
Wt1CreERT2/+,Nr2f2 F/F XY E14.5	0.43	0.5
Wt1CreERT2/+,Nr2f2 F/F XY E14.5	0.22	0.26
Wt1CreERT2/+,Nr2f2 F/F XY E14.5	0.52	0.56
Wt1CreERT2/+,Nr2f2 F/F XY E14.5	0.33	0.16
Wt1CreERT2/+,Nr2f2 F/F XY E14.5	0.13	0.08

## Sheet: HSD3B+ cells area E14.5
Sample	SCTF_823_XY_CONTROL_E14	SCTF_831_XY_CONTROL_E14	SCTF789_XY_CONTROL_E14	SCTF_824_XY_KO_E14	SCTF_825_XY_KO_E14	SCTF788_XY_KO_E14	WCTF_154_XY_CONTROL_E14	WCTF_136_XY_CONTROL_E14	WCTF_139_XY_CONTROL_E14	WCTF_137_XY_KO_E14	WCTF_147_XY_KO_E14	WCTF_142_XY_KO_E14
Genotype	Control XY E14.5	Control XY E14.5	Control XY E14.5	Nr5a1-cre/+,Nr2f2 F/F XY E14.5	Nr5a1-cre/+,Nr2f2 F/F XY E14.5	Nr5a1-cre/+,Nr2f2 F/F XY E14.5	WT XY E14.5	WT XY E14.5	Nr2f2 F/+ XY E14.5	Wt1CreERT2/+,Nr2f2 F/F XY E14.5	Wt1CreERT2/+,Nr2f2 F/F XY E14.5	Wt1CreERT2/+,Nr2f2 F/F XY E14.5
Area (um2)	135.1	125.85	171.82	101.82	108.06	126.78	200.21	199.38	186.48	154.76	140.62	123.46
	134.06	115.45	169.63	99.85	103.17	118.98	157.78	178.37	177.64	148.83	138.22	117.84
	132.09	112.64	161.52	94.13	101.82	118.67	150.19	171.71	170.26	146.54	126.78	104.32
	130.74	111.18	159.13	90.8	97.87	112.22	149.56	168.8	165.16	142.8	120.34	97.56
	126.16	109.62	147.17	87.37	93.61	107.13	148	168.18	164.75	142.7	119.4	96.62
	124.39	109.62	144.98	81.33	92.25	102.65	143.63	158.51	158.82	141.55	107.02	91.73
	122.73	108.58	143.42	79.56	91.73	101.51	135.31	157.99	158.09	140.82	102.55	89.97
	114.51	105.77	141.14	78	86.53	101.3	133.54	157.05	157.36	139.78	95.06	86.33
	113.57	101.51	138.43	76.55	84.04	94.54	133.23	155.07	157.05	139.37	93.5	83
	110.87	100.26	135.52	73.22	83.31	94.02	131.36	153.2	156.74	136.87	88.41	80.92
	109.83	98.6	132.09	70.41	81.44	91.53	129.18	149.25	155.07	136.04	86.85	80.5
	109.62	98.18	131.15	67.71	79.25	90.07	128.55	148.42	152.47	133.44	86.33	78.84
	107.54	97.56	130.53	67.08	78.42	90.07	128.24	147.48	150.91	131.36	81.96	77.48
	106.71	97.45	128.03	66.77	77.17	89.45	127.51	147.06	150.91	130.94	78.52	75.72
	106.29	95.37	127.3	66.46	76.44	87.26	127.2	146.34	148.62	129.59	76.44	71.97
	103.8	94.75	125.12	66.25	76.24	86.95	125.74	146.02	148.42	129.59	70.52	71.66
	101.41	94.75	124.5	66.25	73.74	85.91	125.43	146.02	147.48	129.28	68.64	70.62
	101.2	92.46	122.83	66.25	72.7	82.48	124.18	145.09	147.38	129.18	63.24	66.67
	100.57	92.25	122.62	65.73	71.35	79.67	123.87	144.98	147.38	128.55	62.82	65.73
	99.95	92.15	122.52	65.32	70.83	78.94	122.42	144.57	145.71	128.34	61.36	65.42
	99.01	91.73	122.42	65	69.68	78.11	121.9	144.57	143.53	127.93	60.95	64.48
	99.01	90.59	122.42	63.44	69.16	78.11	121.69	144.05	143.32	122.73	58.97	63.96
	98.49	90.38	119.4	63.13	67.5	77.9	120.65	143.84	142.9	122.42	57.93	61.36
	98.18	89.55	118.15	62.51	66.36	77.59	119.82	143.11	142.9	122	57.52	61.36
	97.35	89.24	117.84	61.99	65.73	77.59	119.09	141.14	141.76	120.65	57	61.16
	96.83	88.82	117.42	60.53	65.21	75.09	117.74	137.6	140.51	119.3	57	60.22
	96.62	88.82	116.59	60.01	64.28	73.95	117.74	135.21	140.2	118.67	56.37	60.22
	94.33	87.57	116.17	59.8	62.72	72.6	117.74	134.9	140.1	116.9	53.67	60.12
	93.92	87.47	115.76	59.28	61.26	72.28	116.59	134.69	139.78	116.59	53.56	58.56
	93.71	87.37	114.72	59.08	60.84	72.08	114.72	133.65	139.37	116.17	51.59	57.1
	93.29	87.26	114.51	58.87	60.43	71.14	113.47	133.13	139.37	114.2	51.59	54.92
	93.19	87.16	113.26	57.2	60.32	70.2	113.26	132.4	139.26	113.37	51.28	53.88
	93.09	84.66	112.74	57.1	60.32	69.89	112.64	132.3	138.95	111.6	50.65	52.11
	92.77	84.56	112.53	56.48	60.32	68.33	111.91	131.88	138.74	108.17	49.4	51.38
	92.67	84.25	112.22	56.27	60.12	68.33	110.77	131.78	136.56	105.98	49.09	51.17
	92.15	83.83	109.1	54.92	59.7	68.12	110.45	131.26	136.56	105.46	48.57	51.07
	91.53	83.62	108.37	54.5	59.6	67.6	109.62	130.22	136.35	103.38	47.01	50.13
	91.42	83.41	107.75	52.21	59.6	67.6	109.62	129.18	135.94	102.55	44.72	49.92
	91.11	83.31	107.44	51.69	59.18	67.5	108.58	129.07	134.79	102.13	43.89	49.71
	91.11	82.79	106.81	51.07	58.56	67.29	107.85	128.97	133.86	102.03	43.58	48.26
	90.69	81.75	106.61	49.61	58.35	66.98	107.33	128.76	133.86	101.3	43.37	48.05
	90.28	81.75	104.53	49.51	57.41	66.88	106.5	128.24	133.75	100.26	42.95	46.7
	90.07	81.54	104.53	48.99	57.41	66.36	105.88	127.62	133.75	99.85	42.23	46.59
	89.97	80.71	103.69	48.88	57.31	66.25	103.49	127.62	132.5	99.01	42.12	46.07
	89.97	80.5	103.17	48.67	57	64.48	102.76	127.51	131.26	98.29	41.81	45.97
	89.65	79.98	103.17	47.95	56.27	64.38	101.61	126.06	131.26	97.87	41.08	45.87
	88.61	79.77	102.45	46.59	56.06	63.65	99.85	126.06	130.53	97.25	40.15	45.45
	87.78	79.77	101.2	46.18	55.02	63.55	99.64	125.85	130.32	95.37	39.21	45.35
	87.37	79.15	100.05	45.45	54.92	63.34	99.01	125.43	129.7	94.75	38.27	44.93
	87.37	78.21	99.95	44.93	54.29	63.34	98.91	125.22	129.28	93.71	38.17	44.93
	87.26	77.9	98.29	44.41	54.08	63.13	97.04	124.08	128.76	93.4	36.92	44.51
	86.74	76.76	98.18	44.31	53.77	62.72	96.52	123.77	127.82	92.46	35.99	44.31
	86.43	75.82	98.18	43.68	53.15	62.3	96.41	122.94	127.72	92.05	35.05	44.2
	86.01	74.88	97.66	41.81	52.42	62.09	92.67	122.83	127.51	90.49	31.51	44.1
	85.91	74.57	97.45	41.6	52.21	61.26	92.67	122.52	126.99	88.93	31.2	44.1
	84.56	73.74	97.25	41.5	51.69	60.95	92.25	122.42	126.89	88.61	30.99	43.27
	84.14	73.74	97.04	40.98	51.07	60.84	92.05	122.42	126.89	88.61	30.06	43.06
	84.04	73.43	96.52	40.87	50.86	60.84	91.94	120.75	125.85	88.51	29.95	42.95
	82.27	73.43	96.52	40.46	50.86	60.74	91.94	120.75	125.33	87.26	28.5	42.85
	82.06	73.32	96.31	40.15	50.13	59.91	91.84	119.92	125.02	86.53	28.08	42.54
	81.23	73.01	96	39.63	50.03	59.8	91.73	119.92	124.91	85.49	27.98	42.23
	81.02	73.01	95.79	38.69	49.51	59.6	91.73	119.5	124.5	85.29	25.69	42.23
	80.71	72.7	95.37	38.59	49.3	59.39	89.34	118.26	124.08	84.04	25.59	41.71
	80.4	72.28	92.36	37.23	49.3	58.76	89.03	118.15	123.77	83.83	24.44	41.6
	79.88	72.18	91.42	36.3	48.78	58.66	88.82	118.15	123.66	83.62	24.03	41.39
	79.77	72.08	91.21	34.01	48.47	58.14	88.2	117.01	121.38	83.52	23.82	41.29
	77.69	71.56	90.49	33.59	47.95	58.04	87.78	116.7	121.17	83.31	23.3	41.08
	77.38	71.24	89.76	33.49	47.84	58.04	87.57	116.07	120.54	83.31	22.57	40.98
	76.96	70.62	89.45	33.07	46.59	57.93	86.33	115.34	120.44	82.79	21.01	40.67
	76.65	69.89	89.24	32.97	45.55	57.41	86.01	115.13	120.34	82.58	20.91	40.25
	76.13	69.68	87.16	32.14	45.45	56.58	85.6	114.82	120.13	82.37	20.28	39.31
	75.09	69.16	86.85	31.41	45.14	56.06	85.49	114.72	118.88	81.85	20.28	39
	74.88	68.64	86.53	31.31	45.03	55.64	85.39	114.3	117.63	80.19		37.96
	74.68	68.64	86.53	31.1	44.93	55.54	85.29	113.89	117.42	80.08		37.55
	74.16	68.54	86.33	30.37	44.83	55.44	84.97	113.26	117.32	80.08		36.92
	74.05	67.19	86.12	30.06	44.83	54.6	84.87	112.85	117.22	79.04		35.88
	73.84	66.77	86.01	29.95	44.72	54.19	84.77	112.74	116.7	78		35.88
	73.74	66.56	85.18	29.64	44.2	53.77	83.93	112.43	116.49	76.76		35.57
	72.91	66.46	83.62	29.54	43.99	52.94	83.93	112.43	116.28	75.92		35.36
	72.6	66.36	83.41	29.02	43.99	52.63	81.85	111.81	115.86	75.92		34.63
	72.6	65.84	83.41	28.91	43.99	52	81.75	111.81	115.76	75.92		34.63
	72.6	65.84	83.31	28.6	43.68	51.69	81.12	111.7	115.65	75.09		34.43
	72.6	65.52	82.16	28.6	43.47	51.48	80.6	111.08	115.24	74.99		33.18
	72.49	65.52	82.06	27.98	42.85	51.48	80.5	110.25	114.61	74.36		32.97
	72.28	65.21	81.96	27.67	42.64	49.4	80.4	110.14	114.41	73.43		32.76
	71.56	64.9	81.96	27.35	42.54	48.47	80.08	109.83	113.89	73.01		32.35
	71.14	64.8	80.5	27.04	42.54	48.26	80.08	109.41	112.33	72.6		32.35
	71.14	64.69	80.19	26.83	42.43	48.05	79.46	109.41	112.22	72.18		31.31
	70.93	64.17	79.98	26.83	41.91	47.32	78.84	109.1	111.6	71.87		31.31
	70.93	63.86	79.67	26.73	41.29	46.8	78.73	109.1	111.08	71.87		30.79
	70.62	63.65	79.56	26.63	41.08	46.49	78.63	109	110.87	71.56		29.95
	70.41	63.34	79.56	26.42	40.56	46.28	78.63	108.27	110.04	71.56		29.54
	70.1	63.24	79.46	26.42	40.56	46.28	78.52	107.33	109.83	71.04		29.12
	70	61.68	79.36	25.59	40.15	45.66	78.32	107.23	109.62	70.62		28.5
	69.89	61.57	79.15	25.07	38.9	45.45	77.8	105.98	109.52	70.62		26.63
	68.75	61.57	79.04	24.23	38.9	45.14	75.82	105.15	108.89	70.62		26
	68.54	61.16	78.63	24.23	38.79	45.03	75.82	104.42	108.17	69.68		26
	68.44	60.64	78.42	23.3	38.79	44.93	75.72	104.21	107.85	69.58		25.9
	67.92	60.53	78	22.88	38.38	44.62	75.51	104.11	107.85	69.48		23.4
	67.5	60.53	77.59	22.88	38.07	44.51	75.3	103.9	107.65	68.85		23.3
	67.19	60.01	77.38	22.47	37.86	44.1	74.99	103.07	107.44	68.12		22.88
	66.56	59.8	76.86	22.26	37.75	43.37	73.01	102.86	106.5	68.02		22.67
	66.36	59.8	76.76	21.74	37.65	42.85	72.6	102.76	106.5	67.6		22.15
	66.15	59.49	76.76	21.53	37.55	42.75	71.76	102.76	106.29	67.4		21.84
	65.94	59.08	76.24	21.22	37.44	42.64	71.56	102.55	106.19	67.29		20.91
	65.84	58.35	76.24	21.22	37.34	42.54	71.45	102.45	106.19	66.98		20.49
	65.52	58.24	76.03	21.22	36.92	42.43	70.72	102.34	105.46	66.77
	64.9	58.14	76.03	21.11	36.82	42.23	70.52	102.03	105.25	66.56
	64.8	58.14	75.82	21.01	36.71	41.71	70.1	102.03	105.05	65.63
	64.59	58.14	75.4	20.59	36.51	41.08	69.68	101.93	104.84	65.42
	64.38	57.2	74.68	20.28	35.99	39.73	69.68	101.82	104.42	65
	64.07	56.48	74.57	20.07	35.47	39.73	69.68	101.51	103.28	64.48
	63.86	56.37	74.26		35.36	39.63	69.58	101.2	102.97	64.28
	63.76	56.16	74.16		34.43	39.63	69.37	100.47	102.65	63.96
	63.44	55.96	74.16		34.01	39.42	69.16	100.37	102.45	63.65
	63.44	55.64	73.43		33.59	39.42	69.06	100.26	102.13	63.65
	63.34	55.54	73.43		33.39	39.31	68.96	100.16	101.3	63.24
	62.61	54.6	73.12		33.39	38.17	68.54	99.95	100.57	62.4
	62.2	53.88	73.12		33.07	38.07	68.33	99.43	100.05	61.99
	61.78	53.77	72.91		32.87	37.65	68.12	99.12	100.05	61.88
	61.47	53.46	72.7		32.76	37.34	66.98	99.01	99.64	61.68
	61.47	53.36	72.39		32.66	36.3	66.88	98.08	99.53	61.26
	61.47	53.25	72.08		32.03	36.19	66.88	97.97	99.53	60.74
	61.16	52.73	70.93		32.03	36.09	66.77	97.77	98.81	60.74
	61.16	52.52	70.72		31.72	35.99	66.67	97.77	98.39	60.43
	61.05	52.11	70.52		30.99	35.78	66.25	97.66	98.18	60.43
	60.95	51.69	70.41		30.16	35.78	65.21	97.56	97.97	60.32
	60.95	50.44	70		29.43	35.78	65.21	97.35	97.87	59.91
	60.64	50.13	69.27		29.43	35.78	65.11	96.73	97.87	59.8
	60.64	50.13	69.16		29.12	35.78	65	96	97.56	59.6
	60.53	49.92	68.02		28.81	35.57	64.9	95.69	97.56	59.49
	59.8	49.82	67.71		28.6	35.47	64.8	94.85	97.45	59.39
	58.97	49.61	67.71		28.29	35.47	64.48	94.65	97.35	59.18
	58.66	49.51	66.77		27.67	35.36	64.38	94.54	96.41	59.08
	58.56	49.3	66.15		27.56	35.05	63.44	94.33	95.89	58.97
	58.45	49.3	66.04		27.35	35.05	63.03	94.02	95.89	58.87
	58.35	49.09	65.84		27.25	34.95	62.92	94.02	95.89	58.76
	58.14	48.99	65.63		27.15	34.95	62.3	94.02	95.37	58.76
	57.72	48.99	65.52		27.15	34.63	62.09	94.02	95.17	58.45
	57.52	48.67	65.32		27.15	34.32	61.88	92.88	94.96	58.35
	57.31	48.15	65.21		27.04	34.32	61.78	92.67	94.85	56.68
	57.31	47.95	65.11		26.94	34.22	61.47	92.57	94.75	56.48
	56.89	47.32	64.69		26.73	34.22	61.26	92.46	94.33	55.75
	56.79	47.22	64.17		26.63	33.91	60.74	92.36	94.23	55.54
	56.79	46.18	63.86		26.63	33.8	60.32	92.25	94.13	55.02
	56.68	46.07	63.13		26.42	33.59	60.01	92.25	93.4	54.71
	56.58	45.66	63.03		26.21	33.49	59.7	92.15	93.29	54.6
	55.96	45.14	61.57		26.21	33.07	59.28	92.15	93.09	54.5
	55.33	45.14	60.74		26.11	32.66	59.18	92.15	92.46	53.98
	54.81	45.14	60.64		26.11	31.51	59.08	91.84	92.46	53.67
	54.6	44.93	60.64		25.79	30.89	58.87	91.63	92.36	53.46
	54.5	44.83	60.53		25.27	30.79	58.24	91.63	92.25	53.15
	54.4	44.72	60.12		25.17	30.06	58.24	91.21	91.84	52.63
	54.08	44.51	59.91		24.96	29.75	58.14	91.21	91.73	52.11
	53.77	44.2	59.7		24.96	29.54	58.14	90.9	91.32	52
	53.56	43.37	58.76		24.86	29.33	57.93	90.28	91.21	51.9
	53.04	43.27	58.76		24.65	28.81	57.52	90.17	91.01	51.48
	52.94	43.27	58.76		24.23	28.81	57.41	90.07	90.69	51.48
	52.63	43.16	58.56		24.03	28.39	57.2	89.76	89.86	51.28
	52.52	43.16	58.45		23.51	27.98	57.1	89.24	89.76	50.76
	52.52	43.06	58.14		23.51	27.77	57.1	88.41	88.2	50.55
	52.52	42.33	58.14		22.78	27.56	56.89	88.3	87.68	50.24
	52.11	42.33	57.62		22.78	27.46	56.79	88.3	87.57	49.82
	51.9	42.23	57.31		22.67	27.46	56.68	88.2	87.37	49.71
	51.8	42.02	57.31		22.57	27.25	56.48	87.99	87.16	49.61
	51.69	41.91	57.2		22.47	27.04	56.06	87.78	86.74	49.61
	51.59	41.29	56.79		21.95	27.04	55.96	87.78	86.53	49.4
	51.38	41.19	56.68		21.74	26.94	55.96	87.78	86.12	49.3
	51.28	41.19	56.58		21.43	26	55.75	87.47	85.91	48.99
	51.17	40.77	56.48		21.32	26	55.75	87.37	85.91	48.78
	51.17	40.77	56.16		20.7	25.79	55.64	87.16	85.18	48.78
	50.96	40.67	56.16		20.49	25.79	55.23	86.85	85.18	48.67
	50.86	40.25	55.23		20.49	25.38	55.12	86.64	85.08	48.57
	50.44	40.04	54.81			25.27	54.6	85.91	84.97	48.47
	50.44	39.83	54.6			24.96	54.5	85.81	83.52	48.15
	49.82	38.9	54.6			24.13	54.19	85.49	83.31	47.84
	49.82	38.79	54.5			24.13	54.08	85.49	83.2	47.84
	49.71	38.69	53.77			23.51	53.88	85.49	83.2	47.32
	49.19	38.59	53.36			23.4	53.36	85.39	83.1	47.22
	48.99	38.17	53.25			23.19	53.15	85.18	83	46.7
	48.88	37.96	53.25			23.19	52.94	84.97	82.68	46.7
	48.05	37.86	52.94			23.09	52.73	84.77	82.27	46.59
	48.05	37.75	52.94			22.99	52.63	84.25	81.85	46.39
	47.95	37.65	52.73			22.67	52.42	84.14	81.44	46.28
	47.95	37.55	52.63			22.67	52.42	84.04	81.44	45.76
	47.95	37.03	52.52			22.57	51.28	84.04	81.12	45.35
	47.84	36.92	52.42			22.47	51.28	83.93	81.12	44.51
	47.84	36.92	52.32			22.47	51.07	83.52	80.29	44.51
	47.84	36.51	52			22.47	50.96	83.41	80.29	44.41
	47.63	36.3	52			22.26	50.34	83.41	80.08	44.1
	47.43	36.3	52			22.15	49.82	82.58	79.67	43.89
	47.43	35.88	52			21.74	49.71	82.48	79.56	43.79
	47.01	35.88	51.69			21.53	49.4	82.16	79.36	43.68
	46.91	35.67	51.59			21.43	49.09	82.06	79.25	43.16
	46.7	35.67	50.96			21.22	48.99	81.64	79.25	42.85
	46.7	35.47	50.44			20.7	48.78	81.54	78.84	42.64
	46.59	35.26	50.13			20.49	48.57	80.71	78.63	42.43
	46.59	35.05	50.03			20.39	48.26	80.71	78	42.23
	46.28	35.05	49.71			20.39	48.15	80.4	77.48	41.81
	45.97	34.95	49.61			20.28	48.15	80.19	77.17	41.08
	45.76	34.74	49.3			20.07	48.05	80.08	76.76	40.98
	45.55	34.53	49.19				47.84	79.98	76.65	40.87
	45.55	34.22	49.09				47.32	79.67	75.72	40.56
	45.45	34.01	49.09				47.11	79.56	75.4	40.25
	45.35	33.8	47.74				47.01	79.36	75.3	40.25
	45.35	33.59	47.63				46.91	78.94	75.3	40.25
	45.24	33.39	47.32				46.59	78.73	75.09	40.25
	45.03	33.18	47.11				46.28	78.73	74.99	39.94
	44.93	32.55	47.11				46.18	78.63	74.68	39.42
	44.83	32.55	46.8				45.66	78.52	74.68	39.11
	44.83	32.24	46.7				45.66	78.52	74.05	38.9
	44.2	32.14	46.7				45.45	78.21	73.53	38.79
	44.2	32.14	46.59				45.45	78.11	73.53	38.79
	43.99	32.03	46.59				45.24	77.69	73.32	38.48
	43.99	31.62	46.59				45.14	77.07	73.32	38.27
	43.89	31.51	46.49				45.03	76.44	72.91	38.17
	43.79	31.41	46.49				44.93	75.82	72.49	37.96
	43.79	31.1	46.39				44.62	75.72	71.87	37.75
	43.58	30.99	46.39				44.31	75.72	71.45	37.34
	43.37	30.99	46.28				44.1	75.4	71.04	37.34
	43.06	30.37	46.07				43.89	74.78	70.83	37.23
	43.06	30.37	45.87				43.89	74.78	70.1	36.51
	42.95	30.06	45.87				43.68	74.36	69.58	36.3
	42.64	30.06	45.55				43.47	74.26	69.37	36.3
	42.43	29.95	45.55				43.37	73.95	69.16	36.09
	42.33	29.95	45.24				43.37	73.74	69.06	35.99
	41.91	29.95	45.24				43.37	73.64	68.85	35.88
	40.87	29.85	44.83				43.16	73.43	68.54	35.78
	40.67	29.75	44.31				43.16	73.43	68.12	35.78
	40.56	29.54	44.31				43.16	73.43	68.12	35.67
	40.56	29.43	43.79				42.75	73.32	67.92	35.67
	40.56	29.43	43.79				42.43	73.01	67.08	35.67
	40.04	29.02	43.79				42.43	73.01	66.88	35.57
	39.42	28.71	43.79				42.23	72.91	66.56	35.36
	39.31	28.5	43.68				42.12	72.8	66.56	34.74
	39.21	28.5	43.58				42.02	72.7	66.25	34.53
	39.21	28.5	43.47				42.02	72.18	66.25	34.22
	38.9	28.19	43.27				41.91	72.08	65.84	34.01
	38.9	28.08	43.06				41.81	71.87	65.63	33.91
	38.79	27.98	43.06				41.5	71.87	65.52	33.8
	38.59	27.98	42.95				41.39	71.66	65.42	32.55
	38.48	27.87	42.95				40.98	71.35	65.32	32.55
	38.27	27.67	42.95				40.98	71.35	65.21	32.14
	38.27	27.67	42.85				40.98	71.14	65	31.83
	38.07	27.56	42.43				40.67	71.14	64.8	31.72
	38.07	27.25	42.43				40.46	71.04	64.8	31.2
	38.07	26.63	42.33				40.04	70.62	64.8	31.2
	37.86	26.52	42.23				40.04	70.31	64.59	30.99
	37.75	26.31	41.91				39.31	70.1	64.48	30.89
	37.75	26.11	41.71				38.9	69.89	64.07	30.68
	37.75	25.79	41.19				38.79	69.79	64.07	30.47
	37.65	25.69	41.19				38.59	69.37	63.96	30.37
	37.55	25.59	41.08				38.48	69.06	63.96	30.27
	37.34	25.48	41.08				38.07	68.75	63.96	30.27
	37.03	25.48	40.87				37.44	68.33	63.55	29.54
	36.71	25.38	40.56				37.03	68.12	63.03	29.33
	36.61	25.27	40.35				37.03	68.02	62.92	29.33
	36.51	25.27	40.15				36.71	67.81	62.92	29.23
	36.09	25.17	39.94				36.71	67.71	62.82	29.12
	35.99	25.07	39.73				35.99	67.5	62.72	28.81
	35.78	25.07	39.63				35.57	67.29	62.72	28.71
	35.78	24.75	39.52				35.47	67.29	62.51	28.19
	35.47	24.55	39.42				35.15	67.19	62.3	28.19
	35.15	24.23	39.21				34.95	66.88	62.2	27.98
	34.63	24.23	39.21				34.95	66.77	62.2	26.94
	34.32	24.13	39.11				34.63	66.77	61.88	26.73
	33.8	24.13	38.69				34.32	66.56	61.57	26.73
	33.8	24.03	38.59				34.11	66.36	61.47	26.73
	33.7	23.92	38.48				33.91	66.15	61.36	26.52
	33.7	23.82	38.27				33.7	66.15	61.26	25.38
	33.49	23.71	37.96				33.59	65.84	60.95	25.27
	33.49	23.71	37.86				33.59	65.73	60.95	25.27
	33.28	23.71	37.65				33.59	65.42	60.74	24.55
	33.18	23.61	37.55				33.39	65.42	60.64	24.44
	32.76	23.61	37.13				33.28	65.32	60.22	24.13
	32.66	23.51	36.4				32.97	65.32	59.91	24.13
	32.66	23.51	36.3				32.55	65.21	59.7	23.51
	32.66	22.99	36.3				32.35	65.11	59.7	22.78
	32.66	22.99	36.19				32.24	65	59.6	22.67
	32.45	22.67	36.19				31.83	65	59.6	22.57
	32.45	22.57	35.99				31.62	64.17	59.49	22.47
	32.14	22.47	35.88				31.62	63.86	59.28	22.47
	32.14	21.95	35.67				31.31	63.86	59.18	22.47
	32.03	21.95	35.26				30.99	63.44	59.18	21.32
	31.72	21.84	34.95				30.89	63.34	59.08	21.32
	31.62	21.63	34.74				30.79	63.24	58.97	20.8
	31.41	21.53	34.11				30.27	63.13	58.66	20.8
	31.41	21.53	33.49				30.16	63.03	58.45	20.8
	31.41	21.43	33.49				29.85	62.92	58.24	20.7
	31.31	21.43	32.97				29.75	62.92	58.24	20.49
	31.2	21.22	32.66				29.64	62.72	58.04	20.49
	31.1	21.22	32.66				29.33	62.61	57.31	20.39
	30.79	21.22	32.55				29.23	62.61	56.89	20.39
	30.79	21.11	32.45				28.91	62.51	56.79	20.28
	30.68	21.01	32.35				28.6	62.3	56.68	20.28
	30.68	20.91	32.03				28.5	62.09	56.58	20.18
	30.47	20.8	31.83				28.5	62.09	56.16
	30.37	20.8	31.41				28.29	61.99	56.06
	30.37	20.7	31.31				28.19	61.36	56.06
	30.16	20.59	31.31				28.08	60.43	55.96
	30.06	20.49	30.68				26.94	60.32	55.85
	29.54	20.39	30.58				26.83	60.32	55.75
	29.54	20.18	30.58				26.63	60.12	55.44
	29.43		30.47				25.9	59.8	55.44
	29.43		30.47				25.69	59.49	55.44
	29.12		30.37				25.59	58.97	55.33
	28.91		30.16				25.17	58.97	55.23
	28.6		30.16				24.86	58.24	55.12
	28.5		30.06				24.75	58.24	55.02
	28.5		29.95				24.55	58.14	54.92
	28.29		29.95				23.92	58.14	54.81
	27.98		29.75				23.82	57.52	54.81
	27.98		29.43				23.61	56.58	54.6
	27.56		29.12				23.4	56.48	54.6
	27.56		28.39				23.09	56.16	53.98
	27.46		28.29				22.88	55.85	53.46
	27.25		27.98				22.36	55.23	53.46
	27.15		27.87				22.26	55.02	53.15
	27.04		27.67				22.26	55.02	53.04
	27.04		27.56				21.95	55.02	52.84
	26.94		27.46				21.74	54.92	52.84
	26.73		26.63				21.32	54.71	52.21
	26.52		26.63				21.22	54.6	52.21
	26.42		26.21				20.91	54.5	52.11
	26.31		26.11				20.91	54.19	51.8
	26.31		26				20.28	54.08	51.8
	26.31		25.38					54.08	51.69
	26.31		25.38					53.77	51.38
	26		25.17					53.67	51.28
	25.9		24.96					53.56	50.65
	25.69		24.44					53.15	50.44
	25.38		24.23					52.94	50.34
	25.27		24.13					52.84	50.13
	25.27		24.03					52.84	49.92
	25.17		23.61					52.73	49.51
	25.07		23.61					52.73	49.4
	24.96		23.3					52.32	49.4
	24.96		23.19					52.11	49.3
	24.86		22.99					51.9	49.09
	24.75		22.05					51.69	48.99
	24.65		21.53					51.48	48.88
	24.65		21.53					51.38	48.67
	24.44		20.8					51.17	48.47
	24.44		20.59					51.17	48.26
	24.34		20.39					50.86	47.95
	24.23		20.39					50.34	47.43
	24.03		20.18					50.13	47.32
	23.82		20.07					49.92	47.22
	23.71		20.07					49.71	47.11
	23.71							49.51	46.7
	23.61							49.09	45.97
	23.61							49.09	45.97
	23.51							48.99	45.87
	23.51							48.15	45.87
	23.51							48.05	45.55
	23.4							47.32	44.93
	23.4							47.11	44.93
	23.4							47.11	44.93
	23.4							47.11	44.93
	23.19							47.01	44.72
	23.09							46.8	44.51
	22.99							46.7	44.51
	22.88							46.49	43.99
	22.88							46.39	43.99
	22.67							46.28	43.79
	22.67							46.18	43.47
	22.57							46.18	43.47
	22.47							46.07	43.47
	22.36							46.07	43.37
	22.26							45.97	43.37
	22.26							45.87	43.27
	22.15							45.76	43.16
	22.15							45.55	43.16
	21.84							45.24	43.06
	21.74							44.93	43.06
	21.43							44.83	43.06
	21.22							44.51	42.95
	21.22							44.41	42.95
	21.01							44.2	42.85
	20.8							44.1	42.43
	20.59							43.68	42.23
	20.39							43.37	42.23
	20.39							43.16	41.81
	20.28							43.06	41.6
	20.28							43.06	41.5
	20.28							42.95	41.39
	20.28							42.85	41.39
	20.07							42.85	41.29
								42.75	41.29
								42.64	41.29
								42.64	41.29
								42.64	41.08
								42.54	40.98
								42.43	40.98
								42.43	40.87
								42.33	40.87
								42.23	40.67
								42.12	40.67
								42.12	40.46
								42.12	40.25
								42.02	40.15
								42.02	39.94
								42.02	39.94
								41.91	39.83
								41.81	39.63
								41.71	39.42
								41.71	39.31
								41.71	39.31
								41.6	39.11
								41.6	39.11
								41.39	39
								40.87	39
								40.87	38.9
								40.67	38.9
								40.15	38.79
								40.15	38.59
								40.04	38.59
								40.04	38.48
								39.94	38.38
								39.94	38.27
								39.94	38.17
								39.94	38.07
								39.73	37.96
								39.63	37.86
								39.52	37.44
								39.52	37.44
								39.21	37.34
								39.11	37.23
								39	37.13
								38.9	37.03
								38.69	37.03
								38.48	36.92
								38.38	36.71
								38.38	36.71
								38.17	36.61
								38.17	36.61
								38.17	36.51
								38.07	36.51
								38.07	36.3
								37.96	36.3
								37.75	36.3
								37.65	35.99
								37.44	35.88
								37.23	35.88
								37.03	35.78
								37.03	35.67
								36.92	35.47
								36.4	35.36
								36.3	35.26
								36.19	35.15
								36.19	35.15
								36.09	34.95
								36.09	34.63
								35.99	34.53
								35.88	34.53
								35.67	34.32
								35.67	34.01
								35.67	34.01
								35.47	34.01
								35.47	33.91
								35.47	33.91
								34.74	33.91
								34.74	33.91
								34.53	33.8
								34.43	33.8
								34.32	33.7
								34.32	33.7
								34.32	33.7
								34.22	33.7
								34.22	33.7
								34.11	33.49
								33.91	33.18
								33.91	33.18
								33.7	33.07
								33.7	32.97
								33.59	32.87
								33.59	32.66
								33.39	32.66
								33.39	32.55
								33.28	32.55
								33.28	32.24
								32.97	31.51
								32.76	31.51
								32.66	31.41
								32.66	31.41
								32.45	31.31
								32.24	30.99
								32.03	30.79
								31.83	30.79
								31.72	30.58
								31.62	30.47
								31.62	30.37
								31.51	30.06
								31.2	30.06
								30.99	29.95
								30.79	29.75
								30.68	29.54
								30.68	29.54
								30.37	29.54
								30.27	29.43
								29.95	29.33
								29.95	29.12
								29.85	29.12
								29.85	29.02
								29.64	29.02
								29.64	28.5
								29.23	28.5
								28.91	28.5
								28.71	28.29
								28.71	28.19
								28.6	28.08
								28.5	27.98
								28.5	27.98
								28.19	27.98
								28.08	27.87
								28.08	27.87
								27.98	27.87
								27.67	27.77
								27.35	27.56
								27.35	27.46
								27.25	27.46
								27.15	27.46
								27.04	27.25
								27.04	27.25
								26.94	27.15
								26.73	27.04
								26.73	26.94
								26.63	26.94
								26.52	26.83
								26.42	26.73
								26.31	26.31
								26.31	26.21
								26.21	26.21
								26	26.11
								25.48	26.11
								25.48	25.9
								25.38	25.79
								24.96	25.79
								24.96	25.59
								24.86	25.27
								24.86	25.17
								24.75	25.07
								24.75	24.86
								24.75	24.75
								24.75	24.55
								24.65	24.34
								24.55	24.23
								24.55	24.23
								24.13	24.13
								23.92	24.13
								23.71	23.61
								23.61	23.51
								23.61	23.3
								23.4	23.3
								23.4	23.19
								23.3	22.99
								23.19	22.78
								23.09	22.57
								22.88	22.57
								22.78	22.47
								22.67	22.36
								22.67	22.15
								22.57	21.84
								22.57	21.43
								22.57	21.43
								22.36	20.8
								22.15	20.59
								22.05	20.39
								22.05	20.39
								21.84	20.39
								21.84	20.28
								21.84	20.28
								21.63	20.28
								21.53	20.28
								21.43	20.07
								21.32
								21.32
								21.11
								21.11
								21.01
								20.8
								20.8
								20.7
								20.07

## Sheet: HSD3B+ cells circularity E14.5
Sample	SCTF_823_XY_CONTROL_E14	SCTF_831_XY_CONTROL_E14	SCTF789_XY_CONTROL_E14	SCTF_824_XY_KO_E14	SCTF_825_XY_KO_E14	SCTF788_XY_KO_E14	WCTF_154_XY_CONTROL_E14	WCTF_136_XY_CONTROL_E14	WCTF_139_XY_CONTROL_E14	WCTF_137_XY_KO_E14	WCTF_147_XY_KO_E14	WCTF_142_XY_KO_E14
Genotype	Control XY E14.5	Control XY E14.5	Control XY E14.5	Nr5a1-cre/+,Nr2f2 F/F XY E14.5	Nr5a1-cre/+,Nr2f2 F/F XY E14.5	Nr5a1-cre/+,Nr2f2 F/F XY E14.5	WT XY E14.5	WT XY E14.5	Nr2f2 F/+ XY E14.5	Wt1CreERT2/+,Nr2f2 F/F XY E14.5	Wt1CreERT2/+,Nr2f2 F/F XY E14.5	Wt1CreERT2/+,Nr2f2 F/F XY E14.5
Circularity	0.89	0.93	0.9	0.8	0.95	0.72	0.91	0.89	0.79	0.97	0.39	0.9
	0.96	0.82	0.96	0.92	0.92	0.91	0.98	0.86	0.9	0.95	0.44	0.32
	0.99	0.97	0.86	0.96	0.93	0.92	0.94	0.97	0.77	0.94	0.92	0.87
	0.88	0.76	0.88	0.97	0.98	0.88	0.82	0.93	0.94	0.95	0.75	0.81
	0.91	0.87	0.91	0.95	0.97	0.96	0.96	0.99	0.88	0.93	0.88	0.53
	0.99	0.48	0.95	0.96	0.92	0.93	0.83	0.98	0.9	0.93	0.91	0.93
	0.96	0.91	0.97	0.82	0.91	0.93	0.94	0.91	0.89	0.93	0.93	0.88
	0.88	0.74	0.81	0.95	0.91	0.79	0.86	0.95	0.78	0.88	0.86	0.83
	0.89	0.96	0.96	0.96	0.96	0.95	0.96	0.91	0.97	0.97	0.77	0.89
	0.94	0.96	0.93	0.97	0.97	0.93	0.93	0.84	0.97	0.95	0.93	0.87
	0.94	0.89	0.96	0.94	0.94	0.75	0.98	0.94	0.92	0.88	0.94	0.73
	0.97	0.93	0.96	0.97	0.71	0.74	0.92	0.95	0.94	0.9	0.51	0.81
	0.87	0.97	0.9	0.96	0.9	0.82	0.95	0.9	0.9	0.98	0.82	0.93
	0.95	0.89	0.94	0.95	0.94	0.94	0.88	0.98	0.93	0.92	0.47	0.67
	0.94	0.95	0.97	0.88	0.98	0.84	0.95	0.95	0.95	0.94	0.31	0.93
	0.98	0.76	0.96	0.97	0.95	0.81	0.93	0.93	0.93	0.9	0.93	0.66
	0.9	0.9	0.9	0.91	0.98	0.95	0.97	0.98	0.84	0.93	0.81	0.68
	0.93	0.93	0.96	0.89	0.82	0.93	0.97	0.55	0.77	0.93	0.85	0.94
	0.94	0.95	0.94	0.67	0.93	0.92	0.91	0.88	0.93	0.63	0.62	0.87
	0.92	0.94	0.89	0.84	0.89	0.96	0.92	0.92	0.93	0.82	0.83	0.77
	0.96	0.91	0.95	0.93	0.88	0.96	0.97	0.88	0.95	0.91	0.86	0.77
	0.95	0.95	0.94	0.89	0.95	0.79	0.9	0.96	0.95	0.84	0.64	0.92
	0.97	0.97	0.9	0.92	0.68	0.81	0.97	0.96	0.95	0.97	0.9	0.85
	0.93	0.97	0.77	0.81	0.84	0.92	0.75	0.92	0.95	0.96	0.96	0.79
	0.98	0.89	0.98	0.97	0.95	0.93	0.87	0.64	0.97	0.97	0.84	0.76
	0.87	0.81	0.94	0.8	0.93	0.89	0.86	0.96	0.81	0.88	0.92	0.93
	0.95	0.79	0.93	0.79	0.96	0.96	0.86	0.91	0.95	0.96	0.39	0.94
	0.93	0.95	0.95	0.89	0.92	0.8	0.86	0.96	0.9	0.97	0.42	0.86
	0.91	0.93	0.94	0.94	0.92	0.88	0.41	0.92	0.97	0.86	0.68	0.69
	0.73	0.98	0.87	0.87	0.95	0.56	0.88	0.98	0.98	0.97	0.25	0.87
	0.93	0.97	0.94	0.89	0.76	0.84	0.73	0.9	0.95	0.88	0.74	0.73
	0.98	0.95	0.95	0.83	0.82	0.9	0.93	0.97	0.97	0.88	0.65	0.79
	0.92	0.95	0.88	0.92	0.95	0.86	0.8	0.98	0.81	0.77	0.96	0.72
	0.9	0.89	0.98	0.85	0.74	0.82	0.89	0.95	0.97	0.95	0.77	0.65
	0.88	0.74	0.96	0.55	0.9	0.83	0.89	0.98	0.81	0.96	0.55	0.82
	0.95	0.93	0.95	0.92	0.96	0.93	0.88	0.6	0.98	0.94	0.54	0.77
	0.93	0.91	0.91	0.94	0.88	0.97	0.97	0.94	0.95	0.97	0.55	0.83
	0.96	0.9	0.75	0.9	0.88	0.93	0.97	0.97	0.9	0.93	0.86	0.85
	0.93	0.97	0.94	0.93	0.88	0.9	0.95	0.96	0.92	0.89	0.91	0.92
	0.95	0.96	0.91	0.95	0.87	0.95	0.84	0.91	0.99	0.91	0.84	0.81
	0.95	0.95	0.88	0.97	0.92	0.88	0.9	0.93	0.98	0.76	0.71	0.67
	0.88	0.95	0.84	0.9	0.95	0.87	0.95	0.88	0.92	0.83	0.76	0.79
	0.94	0.97	0.83	0.88	0.79	0.73	0.93	0.98	0.9	0.78	0.81	0.79
	0.94	0.93	0.91	0.61	0.94	0.94	0.92	0.83	0.82	0.87	0.77	0.75
	0.91	0.95	0.86	0.96	0.76	0.97	0.9	0.97	0.97	0.97	0.9	0.78
	0.98	0.72	0.98	0.89	0.86	0.95	0.81	0.93	0.91	0.8	0.88	0.78
	0.91	0.97	0.96	0.96	0.95	0.82	0.83	0.79	0.89	0.95	0.86	0.85
	0.95	0.87	0.79	0.93	0.85	0.85	0.81	0.95	0.9	0.89	0.63	0.76
	0.97	0.95	0.97	0.91	0.97	0.9	0.84	0.92	0.91	0.87	0.24	0.58
	0.89	0.96	0.97	0.82	0.96	0.95	0.89	0.97	0.98	0.74	0.65	0.81
	0.95	0.89	0.83	0.93	0.89	0.96	0.86	0.94	0.87	0.95	0.83	0.55
	0.93	0.98	0.98	0.87	0.81	0.94	0.91	0.95	0.72	0.93	0.89	0.82
	0.97	0.89	0.92	0.73	0.81	0.77	0.89	0.97	0.94	0.95	0.41	0.83
	0.92	0.83	0.96	0.87	0.77	0.95	0.93	0.98	0.91	0.87	0.24	0.71
	0.93	0.88	0.94	0.75	0.96	0.93	0.92	0.88	0.97	0.83	0.81	0.79
	0.94	0.84	0.92	0.78	0.89	0.88	0.93	0.87	0.92	0.81	0.81	0.46
	0.97	0.79	0.87	0.87	0.97	0.88	0.92	0.97	0.95	0.92	0.23	0.68
	0.98	0.97	0.85	0.97	0.91	0.94	0.97	0.93	0.97	0.52	0.89	0.89
	0.94	0.97	0.95	0.93	0.76	0.93	0.72	0.84	0.97	0.97	0.67	0.79
	0.91	0.68	0.76	0.85	0.97	0.97	0.95	0.85	0.79	0.93	0.41	0.84
	0.91	0.96	0.98	0.84	0.92	0.88	0.92	0.94	0.93	0.83	0.78	0.93
	0.97	0.97	0.81	0.93	0.91	0.88	0.69	0.93	0.95	0.85	0.44	0.63
	0.96	0.9	0.82	0.91	0.9	0.96	0.95	0.97	0.98	0.83	0.88	0.79
	0.83	0.8	0.98	0.84	0.51	0.93	0.89	0.88	0.98	0.88	0.86	0.63
	0.95	0.97	0.9	0.9	0.84	0.82	0.97	0.98	0.96	0.85	0.74	0.85
	0.78	0.95	0.87	0.9	0.95	0.64	0.93	0.84	0.96	0.84	0.9	0.82
	0.94	0.94	0.95	0.58	0.96	0.95	0.89	0.95	0.93	0.84	0.95	0.88
	0.91	0.93	0.97	0.94	0.64	0.91	0.77	0.83	0.94	0.84	0.68	0.72
	0.91	0.97	0.89	0.92	0.77	0.76	0.92	0.94	0.96	0.48	0.8	0.64
	0.91	0.95	0.91	0.88	0.91	0.8	0.93	0.97	0.92	0.98	0.87	0.72
	0.93	0.93	0.84	0.85	0.85	0.79	0.86	0.97	0.9	0.8	0.93	0.58
	0.95	0.97	0.93	0.93	0.68	0.76	0.93	0.87	0.93	0.76	0.86	0.84
	0.92	0.93	0.9	0.81	0.67	0.82	0.87	0.94	0.97	0.59		0.68
	0.88	0.88	0.95	0.89	0.94	0.92	0.96	0.79	0.88	0.98		0.85
	0.98	0.94	0.9	0.93	0.93	0.57	0.85	0.88	0.9	0.71		0.66
	0.9	0.98	0.94	0.9	0.79	0.74	0.92	0.92	0.97	0.94		0.8
	0.97	0.86	0.88	0.9	0.92	0.89	0.84	0.91	0.95	0.75		0.9
	0.93	0.94	0.84	0.94	0.95	0.93	0.88	0.82	0.88	0.6		0.88
	0.93	0.79	0.94	0.89	0.92	0.84	0.94	0.99	0.97	0.96		0.85
	0.86	0.95	0.96	0.94	0.84	0.77	0.89	0.98	0.98	0.97		0.9
	0.96	0.93	0.8	0.94	0.74	0.69	0.8	0.82	0.89	0.65		0.88
	0.92	0.8	0.87	0.87	0.85	0.64	0.93	0.96	0.79	0.95		0.57
	0.86	0.96	0.97	0.84	0.92	0.92	0.95	0.96	0.88	0.86		0.89
	0.96	0.84	0.94	0.94	0.54	0.95	0.82	0.96	0.91	0.94		0.76
	0.87	0.93	0.97	0.88	0.79	0.91	0.94	0.83	0.98	0.97		0.86
	0.9	0.5	0.96	0.94	0.74	0.9	0.9	0.88	0.95	0.95		0.91
	0.9	0.81	0.94	0.93	0.75	0.92	0.88	0.98	0.94	0.77		0.92
	0.8	0.86	0.81	0.89	0.83	0.91	0.89	0.94	0.97	0.91		0.84
	0.94	0.92	0.84	0.95	0.94	0.85	0.9	0.94	0.91	0.69		0.7
	0.83	0.89	0.91	0.89	0.73	0.97	0.9	0.96	0.97	0.82		0.9
	0.95	0.84	0.92	0.92	0.71	0.82	0.78	0.88	0.98	0.95		0.9
	0.94	0.88	0.94	0.92	0.98	0.9	0.88	0.81	0.97	0.83		0.78
	0.91	0.96	0.93	0.82	0.75	0.8	0.92	0.92	0.8	0.77		0.81
	0.83	0.93	0.95	0.89	0.9	0.52	0.79	0.97	0.93	0.97		0.68
	0.97	0.86	0.93	0.86	0.81	0.85	0.92	0.95	0.93	0.93		0.8
	0.92	0.88	0.8	0.94	0.76	0.91	0.94	0.82	0.89	0.95		0.46
	0.89	0.96	0.91	0.95	0.91	0.83	0.77	0.93	0.98	0.96		0.89
	0.97	0.97	0.95	0.92	0.6	0.87	0.87	0.85	0.97	0.89		0.87
	0.97	0.96	0.97	0.93	0.93	0.59	0.86	0.92	0.92	0.73		0.38
	0.96	0.95	0.95	0.85	0.9	0.7	0.91	0.96	0.87	0.84		0.36
	0.96	0.84	0.94	0.89	0.75	0.82	0.88	0.96	0.95	0.93		0.82
	0.97	0.95	0.96	0.87	0.92	0.92	0.85	0.94	0.96	0.86		0.92
	0.95	0.96	0.9	0.91	0.93	0.92	0.91	0.84	0.92	0.72		0.95
	0.97	0.97	0.96	0.89	0.83	0.78	0.86	0.86	0.96	0.93		0.86
	0.93	0.92	0.93	0.9	0.94	0.92	0.9	0.88	0.94	0.92		0.89
	0.88	0.47	0.74	0.91	0.68	0.83	0.86	0.98	0.9	0.93		0.37
	0.93	0.82	0.95	0.86	0.66	0.95	0.84	0.98	0.98	0.78
	0.94	0.88	0.74	0.91	0.79	0.7	0.88	0.95	0.85	0.93
	0.96	0.81	0.82	0.93	0.88	0.93	0.93	0.9	0.94	0.82
	0.92	0.53	0.82	0.91	0.93	0.67	0.88	0.89	0.74	0.96
	0.87	0.91	0.96	0.89	0.68	0.77	0.75	0.97	0.9	0.75
	0.96	0.96	0.87	0.86	0.83	0.88	0.96	0.88	0.96	0.93
	0.84	0.91	0.75		0.77	0.86	0.8	0.76	0.9	0.91
	0.88	0.59	0.87		0.93	0.8	0.87	0.97	0.96	0.89
	0.9	0.76	0.96		0.88	0.9	0.91	0.89	0.84	0.96
	0.82	0.91	0.93		0.54	0.91	0.93	0.82	0.93	0.91
	0.91	0.87	0.85		0.93	0.9	0.86	0.98	0.96	0.86
	0.95	0.89	0.77		0.79	0.94	0.86	0.9	0.94	0.78
	0.92	0.92	0.93		0.9	0.73	0.45	0.93	0.93	0.77
	0.94	0.86	0.97		0.96	0.41	0.81	0.94	0.93	0.74
	0.89	0.88	0.9		0.9	0.91	0.95	0.94	0.95	0.94
	0.65	0.58	0.93		0.73	0.84	0.86	0.94	0.92	0.72
	0.9	0.94	0.86		0.94	0.88	0.53	0.87	0.87	0.96
	0.9	0.77	0.84		0.83	0.86	0.82	0.91	0.95	0.69
	0.87	0.95	0.89		0.87	0.86	0.89	0.94	0.93	0.95
	0.91	0.97	0.88		0.95	0.84	0.86	0.9	0.96	0.92
	0.94	0.9	0.94		0.84	0.88	0.92	0.9	0.86	0.91
	0.95	0.94	0.88		0.72	0.8	0.78	0.92	0.77	0.93
	0.95	0.94	0.8		0.84	0.89	0.97	0.91	0.88	0.53
	0.9	0.92	0.97		0.86	0.87	0.94	0.95	0.85	0.79
	0.68	0.94	0.84		0.89	0.87	0.86	0.85	0.91	0.73
	0.9	0.9	0.95		0.89	0.95	0.92	0.96	0.97	0.88
	0.92	0.92	0.92		0.61	0.87	0.9	0.88	0.92	0.94
	0.94	0.85	0.83		0.69	0.91	0.93	0.79	0.93	0.8
	0.73	0.91	0.92		0.94	0.92	0.9	0.71	0.91	0.95
	0.85	0.69	0.87		0.9	0.64	0.95	0.82	0.95	0.71
	0.92	0.83	0.9		0.95	0.94	0.93	0.93	0.91	0.87
	0.95	0.91	0.92		0.9	0.91	0.75	0.9	0.9	0.89
	0.96	0.94	0.92		0.9	0.9	0.96	0.96	0.93	0.53
	0.76	0.58	0.81		0.81	0.95	0.9	0.84	0.95	0.78
	0.95	0.94	0.92		0.93	0.85	0.78	0.92	0.9	0.8
	0.94	0.93	0.91		0.8	0.87	0.78	0.95	0.82	0.93
	0.89	0.92	0.86		0.91	0.87	0.73	0.91	0.92	0.91
	0.94	0.95	0.85		0.95	0.84	0.74	0.97	0.83	0.96
	0.84	0.96	0.97		0.81	0.96	0.93	0.85	0.92	0.94
	0.81	0.79	0.83		0.88	0.39	0.95	0.78	0.93	0.88
	0.97	0.94	0.94		0.85	0.91	0.84	0.93	0.92	0.89
	0.91	0.97	0.76		0.76	0.96	0.83	0.85	0.93	0.95
	0.93	0.95	0.95		0.78	0.95	0.89	0.86	0.84	0.75
	0.95	0.9	0.85		0.91	0.9	0.89	0.96	0.78	0.87
	0.91	0.92	0.86		0.81	0.96	0.93	0.74	0.83	0.92
	0.93	0.33	0.82		0.93	0.84	0.89	0.97	0.89	0.77
	0.98	0.94	0.92		0.87	0.95	0.9	0.91	0.9	0.87
	0.92	0.85	0.91		0.95	0.81	0.81	0.72	0.93	0.86
	0.9	0.85	0.88		0.94	0.95	0.79	0.9	0.88	0.84
	0.62	0.89	0.92		0.92	0.85	0.88	0.89	0.94	0.96
	0.92	0.9	0.85		0.94	0.9	0.9	0.91	0.9	0.75
	0.96	0.54	0.92		0.9	0.84	0.82	0.88	0.91	0.7
	0.85	0.86	0.88		0.81	0.92	0.96	0.85	0.86	0.76
	0.95	0.81	0.92		0.92	0.81	0.88	0.93	0.96	0.95
	0.7	0.87	0.97		0.81	0.83	0.91	0.96	0.86	0.91
	0.69	0.91	0.93		0.9	0.69	0.9	0.96	0.9	0.71
	0.88	0.91	0.89		0.92	0.86	0.88	0.9	0.95	0.85
	0.96	0.96	0.94		0.88	0.86	0.94	0.95	0.91	0.9
	0.91	0.7	0.84		0.85	0.93	0.95	0.95	0.92	0.89
	0.96	0.95	0.91		0.93	0.87	0.91	0.98	0.93	0.91
	0.7	0.89	0.91		0.87	0.88	0.29	0.88	0.94	0.88
	0.9	0.88	0.96		0.93	0.81	0.93	0.89	0.86	0.83
	0.89	0.92	0.75		0.85	0.95	0.96	0.94	0.93	0.79
	0.94	0.88	0.9		0.69	0.89	0.95	0.97	0.85	0.88
	0.94	0.86	0.91		0.94	0.93	0.88	0.9	0.81	0.87
	0.87	0.95	0.94		0.92	0.93	0.9	0.93	0.8	0.41
	0.68	0.87	0.87		0.95	0.94	0.97	0.97	0.84	0.66
	0.97	0.93	0.92			0.86	0.93	0.93	0.87	0.81
	0.88	0.78	0.96			0.93	0.91	0.9	0.87	0.94
	0.96	0.72	0.65			0.87	0.86	0.95	0.83	0.74
	0.92	0.83	0.83			0.53	0.84	0.95	0.89	0.88
	0.94	0.9	0.78			0.95	0.96	0.86	0.7	0.9
	0.88	0.85	0.94			0.91	0.97	0.97	0.94	0.96
	0.84	0.91	0.86			0.82	0.78	0.6	0.93	0.86
	0.9	0.64	0.87			0.89	0.86	0.95	0.95	0.9
	0.95	0.92	0.86			0.86	0.37	0.96	0.97	0.85
	0.92	0.94	0.87			0.91	0.95	0.93	0.9	0.9
	0.89	0.91	0.92			0.85	0.96	0.97	0.94	0.95
	0.84	0.88	0.87			0.9	0.88	0.98	0.95	0.9
	0.97	0.89	0.97			0.89	0.8	0.83	0.92	0.88
	0.84	0.89	0.94			0.9	0.26	0.95	0.95	0.92
	0.96	0.8	0.85			0.9	0.88	0.94	0.87	0.94
	0.9	0.89	0.78			0.85	0.87	0.93	0.88	0.72
	0.95	0.93	0.81			0.71	0.91	0.88	0.88	0.76
	0.9	0.76	0.91			0.74	0.92	0.86	0.89	0.89
	0.93	0.94	0.9			0.9	0.61	0.96	0.85	0.83
	0.79	0.81	0.93			0.65	0.88	0.93	0.93	0.88
	0.94	0.95	0.96			0.72	0.92	0.95	0.98	0.92
	0.81	0.9	0.94			0.87	0.86	0.97	0.82	0.86
	0.89	0.88	0.82			0.89	0.97	0.8	0.84	0.78
	0.77	0.86	0.89			0.89	0.87	0.94	0.88	0.74
	0.88	0.78	0.85			0.89	0.9	0.82	0.95	0.89
	0.91	0.74	0.94			0.7	0.63	0.9	0.91	0.89
	0.89	0.88	0.84			0.85	0.73	0.89	0.84	0.93
	0.94	0.81	0.89			0.85	0.82	0.9	0.88	0.93
	0.92	0.84	0.9				0.89	0.9	0.98	0.92
	0.79	0.82	0.92				0.86	0.86	0.96	0.88
	0.96	0.95	0.9				0.78	0.92	0.8	0.95
	0.93	0.9	0.91				0.89	0.93	0.94	0.96
	0.78	0.96	0.9				0.94	0.73	0.78	0.81
	0.75	0.93	0.84				0.87	0.92	0.95	0.66
	0.96	0.95	0.84				0.95	0.93	0.94	0.81
	0.94	0.86	0.79				0.77	0.88	0.9	0.95
	0.79	0.89	0.92				0.96	0.98	0.89	0.93
	0.8	0.88	0.97				0.66	0.97	0.93	0.71
	0.95	0.96	0.85				0.85	0.91	0.92	0.9
	0.79	0.92	0.97				0.88	0.93	0.86	0.84
	0.92	0.94	0.9				0.81	0.92	0.91	0.84
	0.91	0.93	0.77				0.94	0.81	0.75	0.79
	0.96	0.9	0.89				0.87	0.83	0.88	0.93
	0.94	0.92	0.93				0.88	0.87	0.9	0.86
	0.77	0.94	0.96				0.91	0.96	0.92	0.67
	0.92	0.85	0.89				0.85	0.97	0.93	0.9
	0.93	0.73	0.77				0.92	0.91	0.91	0.78
	0.86	0.95	0.86				0.9	0.96	0.93	0.83
	0.93	0.9	0.95				0.84	0.88	0.86	0.97
	0.86	0.94	0.76				0.93	0.95	0.92	0.93
	0.84	0.93	0.93				0.8	0.95	0.87	0.96
	0.89	0.84	0.88				0.88	0.89	0.9	0.9
	0.79	0.9	0.87				0.84	0.8	0.93	0.95
	0.84	0.87	0.94				0.81	0.8	0.91	0.89
	0.84	0.9	0.97				0.76	0.93	0.9	0.94
	0.94	0.92	0.76				0.74	0.95	0.83	0.9
	0.95	0.87	0.76				0.94	0.96	0.81	0.89
	0.95	0.81	0.86				0.72	0.95	0.94	0.92
	0.82	0.94	0.93				0.94	0.91	0.8	0.85
	0.95	0.9	0.81				0.9	0.83	0.91	0.78
	0.95	0.9	0.86				0.81	0.92	0.9	0.89
	0.9	0.91	0.8				0.89	0.93	0.82	0.89
	0.86	0.93	0.95				0.95	0.95	0.88	0.95
	0.79	0.79	0.93				0.95	0.87	0.89	0.92
	0.94	0.94	0.87				0.8	0.88	0.87	0.94
	0.93	0.88	0.95				0.9	0.92	0.86	0.9
	0.96	0.86	0.96				0.83	0.93	0.89	0.94
	0.96	0.95	0.92				0.88	0.93	0.94	0.95
	0.92	0.92	0.87				0.87	0.92	0.72	0.88
	0.92	0.93	0.7				0.76	0.84	0.91	0.9
	0.95	0.8	0.89				0.67	0.94	0.88	0.87
	0.89	0.94	0.84				0.88	0.95	0.96	0.87
	0.97	0.92	0.9				0.7	0.95	0.96	0.87
	0.91	0.95	0.86				0.9	0.67	0.9	0.95
	0.96	0.94	0.79				0.86	0.91	0.95	0.95
	0.95	0.79	0.84				0.76	0.94	0.88	0.83
	0.9	0.84	0.9				0.85	0.96	0.88	0.93
	0.94	0.88	0.82				0.92	0.85	0.94	0.76
	0.86	0.94	0.8				0.94	0.97	0.93	0.89
	0.96	0.92	0.89				0.95	0.93	0.87	0.8
	0.86	0.92	0.87				0.93	0.88	0.92	0.94
	0.86	0.88	0.91				0.69	0.9	0.8	0.86
	0.83	0.89	0.96				0.94	0.93	0.88	0.85
	0.9	0.94	0.95				0.95	0.86	0.96	0.9
	0.91	0.93	0.84				0.91	0.95	0.86	0.94
	0.81	0.82	0.93				0.87	0.88	0.93	0.36
	0.94	0.93	0.8				0.93	0.83	0.82	0.78
	0.93	0.8	0.92				0.77	0.84	0.9	0.85
	0.95	0.94	0.83				0.93	0.94	0.82	0.77
	0.95	0.92	0.79				0.9	0.78	0.86	0.77
	0.89	0.88	0.9				0.91	0.85	0.87	0.9
	0.94	0.87	0.95				0.81	0.51	0.78	0.91
	0.83	0.81	0.8				0.93	0.84	0.92	0.92
	0.94	0.9	0.88				0.87	0.86	0.98	0.89
	0.89	0.88	0.87				0.92	0.77	0.91	0.85
	0.77	0.82	0.87				0.91	0.97	0.92	0.89
	0.93	0.83	0.93				0.87	0.93	0.92	0.8
	0.88	0.93	0.89				0.69	0.79	0.86	0.93
	0.81	0.73	0.87				0.74	0.85	0.87	0.93
	0.92	0.93	0.84				0.6	0.94	0.91	0.91
	0.94	0.85	0.88				0.47	0.9	0.85	0.93
	0.93	0.84	0.7				0.96	0.88	0.9	0.82
	0.93	0.91	0.9				0.87	0.86	0.79	0.87
	0.93	0.92	0.88				0.95	0.96	0.95	0.87
	0.91	0.93	0.85				0.88	0.93	0.89	0.83
	0.92	0.9	0.91				0.87	0.91	0.93	0.92
	0.96	0.83	0.91				0.93	0.93	0.91	0.92
	0.94	0.9	0.85				0.96	0.92	0.78	0.81
	0.86	0.89	0.84				0.88	0.9	0.96	0.9
	0.91	0.88	0.84				0.95	0.84	0.87	0.87
	0.92	0.89	0.91				0.9	0.92	0.76	0.84
	0.91	0.94	0.78				0.94	0.79	0.94	0.91
	0.9	0.95	0.93				0.35	0.84	0.93	0.83
	0.93	0.93	0.72				0.88	0.87	0.82	0.84
	0.86	0.9	0.91				0.8	0.85	0.89	0.93
	0.93	0.89	0.89				0.95	0.9	0.94	0.84
	0.84	0.92	0.79				0.96	0.89	0.84	0.88
	0.89	0.91	0.94				0.95	0.89	0.87	0.88
	0.93	0.86	0.85				0.43	0.9	0.91	0.84
	0.87	0.93	0.86				0.83	0.89	0.85	0.85
	0.89	0.93	0.85				0.91	0.96	0.93	0.8
	0.95	0.91	0.87				0.94	0.97	0.88	0.93
	0.93	0.82	0.89				0.89	0.91	0.86	0.82
	0.94	0.79	0.94				0.87	0.89	0.75
	0.94	0.82	0.89				0.89	0.85	0.88
	0.9	0.93	0.92				0.84	0.86	0.83
	0.93	0.78	0.89				0.9	0.73	0.8
	0.9	0.92	0.93				0.87	0.92	0.86
	0.91	0.79	0.96				0.8	0.92	0.89
	0.94	0.89	0.95				0.9	0.94	0.85
	0.94		0.89				0.95	0.9	0.84
	0.91		0.89				0.93	0.94	0.87
	0.95		0.93				0.92	0.88	0.92
	0.89		0.93				0.78	0.89	0.88
	0.95		0.83				0.92	0.84	0.86
	0.82		0.76				0.81	0.96	0.73
	0.81		0.95				0.91	0.83	0.85
	0.95		0.75				0.92	0.88	0.96
	0.89		0.86				0.83	0.92	0.87
	0.84		0.73				0.87	0.91	0.92
	0.89		0.93				0.89	0.83	0.71
	0.86		0.92				0.93	0.84	0.94
	0.95		0.79				0.9	0.89	0.87
	0.9		0.93				0.89	0.95	0.91
	0.88		0.9				0.87	0.92	0.88
	0.91		0.83				0.92	0.84	0.96
	0.84		0.85				0.89	0.57	0.86
	0.8		0.82				0.84	0.68	0.92
	0.88		0.94				0.9	0.92	0.87
	0.85		0.96				0.9	0.76	0.9
	0.93		0.92				0.9	0.93	0.92
	0.95		0.83				0.86	0.9	0.96
	0.87		0.78				0.88	0.95	0.79
	0.92		0.93					0.91	0.87
	0.89		0.9					0.82	0.91
	0.94		0.89					0.77	0.94
	0.77		0.85					0.83	0.87
	0.93		0.92					0.66	0.86
	0.9		0.81					0.94	0.79
	0.93		0.91					0.78	0.97
	0.88		0.76					0.91	0.92
	0.94		0.89					0.93	0.89
	0.84		0.87					0.85	0.92
	0.93		0.82					0.83	0.96
	0.92		0.82					0.95	0.76
	0.8		0.81					0.95	0.91
	0.88		0.91					0.93	0.89
	0.81		0.89					0.73	0.9
	0.8		0.93					0.96	0.82
	0.92		0.91					0.93	0.87
	0.94		0.78					0.83	0.92
	0.95		0.8					0.61	0.94
	0.89		0.92					0.93	0.94
	0.9		0.86					0.95	0.91
	0.92		0.89					0.89	0.96
	0.95		0.85					0.93	0.95
	0.92							0.94	0.95
	0.89							0.89	0.9
	0.89							0.85	0.83
	0.93							0.91	0.89
	0.93							0.97	0.9
	0.91							0.76	0.87
	0.94							0.92	0.77
	0.9							0.96	0.91
	0.94							0.9	0.85
	0.81							0.88	0.87
	0.89							0.95	0.79
	0.9							0.94	0.85
	0.87							0.88	0.92
	0.92							0.93	0.89
	0.89							0.94	0.92
	0.94							0.88	0.89
	0.89							0.78	0.93
	0.94							0.83	0.86
	0.89							0.86	0.81
	0.89							0.87	0.91
	0.94							0.83	0.88
	0.75							0.78	0.74
	0.9							0.85	0.89
	0.83							0.86	0.94
	0.84							0.74	0.92
	0.88							0.83	0.81
	0.88							0.85	0.8
	0.93							0.93	0.72
	0.88							0.94	0.88
	0.93							0.97	0.84
	0.9							0.9	0.93
	0.94							0.95	0.93
	0.91							0.87	0.88
	0.85							0.85	0.92
	0.92							0.88	0.82
	0.9							0.92	0.91
	0.92							0.91	0.88
	0.86							0.95	0.92
	0.94							0.92	0.92
								0.94	0.93
								0.96	0.93
								0.92	0.88
								0.94	0.95
								0.9	0.84
								0.87	0.82
								0.77	0.91
								0.83	0.93
								0.77	0.96
								0.86	0.91
								0.72	0.94
								0.92	0.85
								0.88	0.91
								0.93	0.88
								0.88	0.94
								0.92	0.95
								0.92	0.72
								0.96	0.89
								0.86	0.91
								0.84	0.75
								0.96	0.87
								0.96	0.72
								0.92	0.94
								0.95	0.86
								0.92	0.93
								0.91	0.84
								0.97	0.92
								0.95	0.93
								0.78	0.83
								0.89	0.94
								0.88	0.96
								0.94	0.92
								0.88	0.91
								0.8	0.93
								0.76	0.93
								0.75	0.95
								0.91	0.92
								0.94	0.93
								0.85	0.93
								0.9	0.86
								0.95	0.87
								0.95	0.91
								0.88	0.79
								0.9	0.92
								0.91	0.88
								0.91	0.89
								0.94	0.91
								0.91	0.96
								0.93	0.88
								0.95	0.89
								0.81	0.84
								0.93	0.91
								0.95	0.87
								0.72	0.94
								0.84	0.9
								0.72	0.94
								0.82	0.9
								0.87	0.82
								0.89	0.91
								0.93	0.88
								0.84	0.86
								0.85	0.95
								0.91	0.87
								0.95	0.83
								0.73	0.81
								0.95	0.9
								0.78	0.91
								0.95	0.9
								0.92	0.94
								0.93	0.91
								0.84	0.89
								0.83	0.91
								0.94	0.92
								0.93	0.88
								0.89	0.86
								0.94	0.8
								0.81	0.95
								0.87	0.87
								0.93	0.96
								0.91	0.88
								0.93	0.89
								0.81	0.84
								0.92	0.95
								0.88	0.86
								0.91	0.95
								0.89	0.87
								0.72	0.88
								0.88	0.93
								0.95	0.82
								0.91	0.92
								0.77	0.93
								0.78	0.87
								0.89	0.8
								0.94	0.91
								0.94	0.84
								0.96	0.93
								0.71	0.75
								0.86	0.83
								0.76	0.95
								0.94	0.9
								0.77	0.94
								0.86	0.94
								0.84	0.86
								0.93	0.88
								0.83	0.91
								0.93	0.77
								0.92	0.89
								0.9	0.73
								0.93	0.94
								0.85	0.94
								0.91	0.91
								0.95	0.88
								0.93	0.86
								0.94	0.92
								0.96	0.89
								0.86	0.93
								0.81	0.94
								0.9	0.9
								0.92	0.94
								0.91	0.81
								0.94	0.92
								0.68	0.84
								0.87	0.92
								0.94	0.86
								0.78	0.91
								0.85	0.91
								0.82	0.79
								0.88	0.94
								0.84	0.85
								0.9	0.86
								0.93	0.94
								0.92	0.92
								0.84	0.7
								0.96	0.83
								0.97	0.88
								0.77	0.78
								0.85	0.92
								0.88	0.94
								0.9	0.92
								0.92	0.8
								0.92	0.84
								0.85	0.87
								0.91	0.93
								0.7	0.91
								0.91	0.86
								0.54	0.82
								0.74	0.92
								0.83	0.94
								0.92	0.88
								0.9	0.93
								0.94	0.95
								0.9	0.91
								0.91	0.92
								0.92	0.96
								0.95	0.82
								0.9	0.91
								0.91	0.91
								0.95	0.89
								0.89	0.94
								0.97	0.9
								0.89	0.9
								0.92	0.86
								0.89	0.77
								0.95	0.9
								0.93	0.89
								0.91	0.91
								0.95	0.94
								0.83	0.9
								0.92	0.95
								0.93	0.88
								0.81	0.93
								0.91	0.82
								0.83	0.9
								0.87	0.73
								0.94	0.89
								0.82	0.88
								0.84	0.93
								0.73	0.84
								0.8	0.91
								0.86	0.91
								0.8	0.9
								0.93	0.91
								0.89	0.91
								0.91	0.92
								0.91	0.93
								0.76	0.93
								0.95	0.94
								0.94
								0.7
								0.93
								0.88
								0.93
								0.91
								0.8
								0.92
								0.95
